# Supplementary material
Source: Springer Nature journal article supplement (https://mijn.bsl.nl/resource/supplementary/13047_2013_744_MOESM2_ESM.pdf/7113032)

**FIGURE 2.** Study Selection Flow Diagram

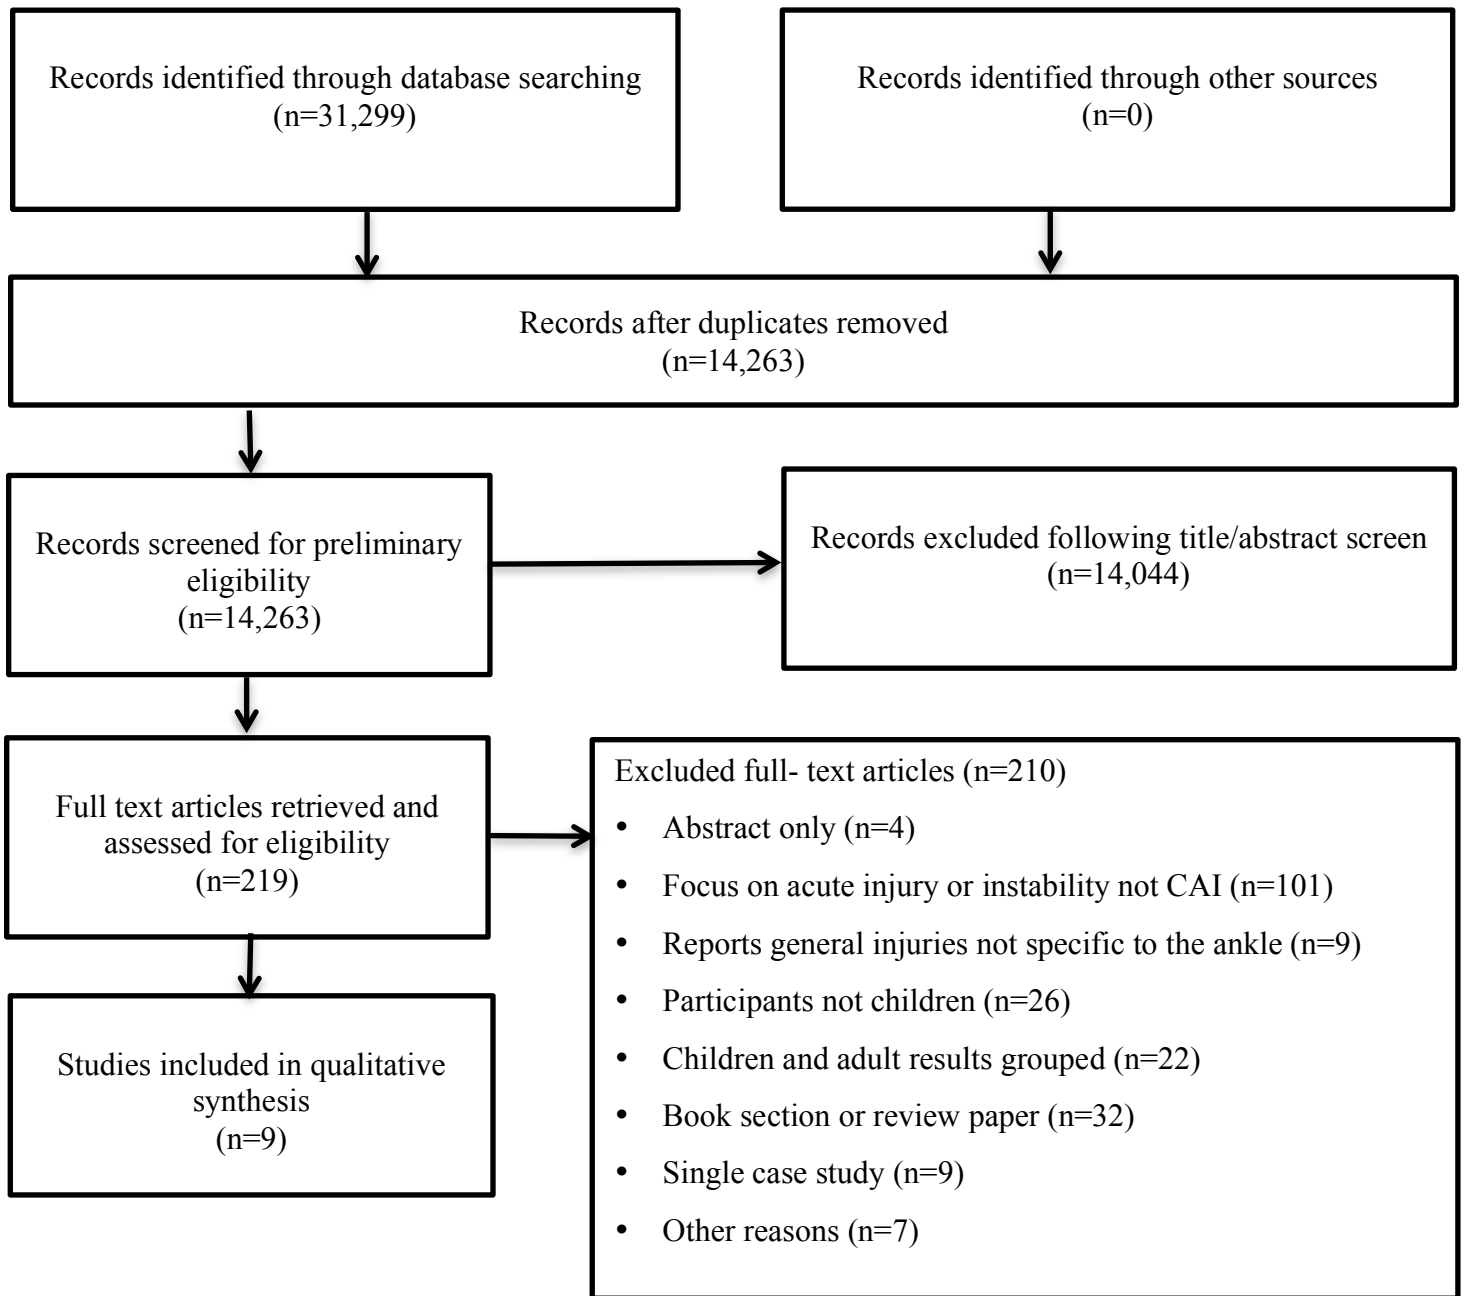

Supplement: MOESM2 [file 7113032]
